# Supplementary material for: Understanding of physicochemical properties and antioxidant activity of ovalbumin–sodium alginate composite nanoparticle-encapsulated kaempferol/tannin acid
Source: Royal Society of Chemistry journal article supplement (doi:10.1039/d2ra02708a), 2022-01-01
Supplement: d2ra02708a1.pdf [file d2ra02708a1.pdf]

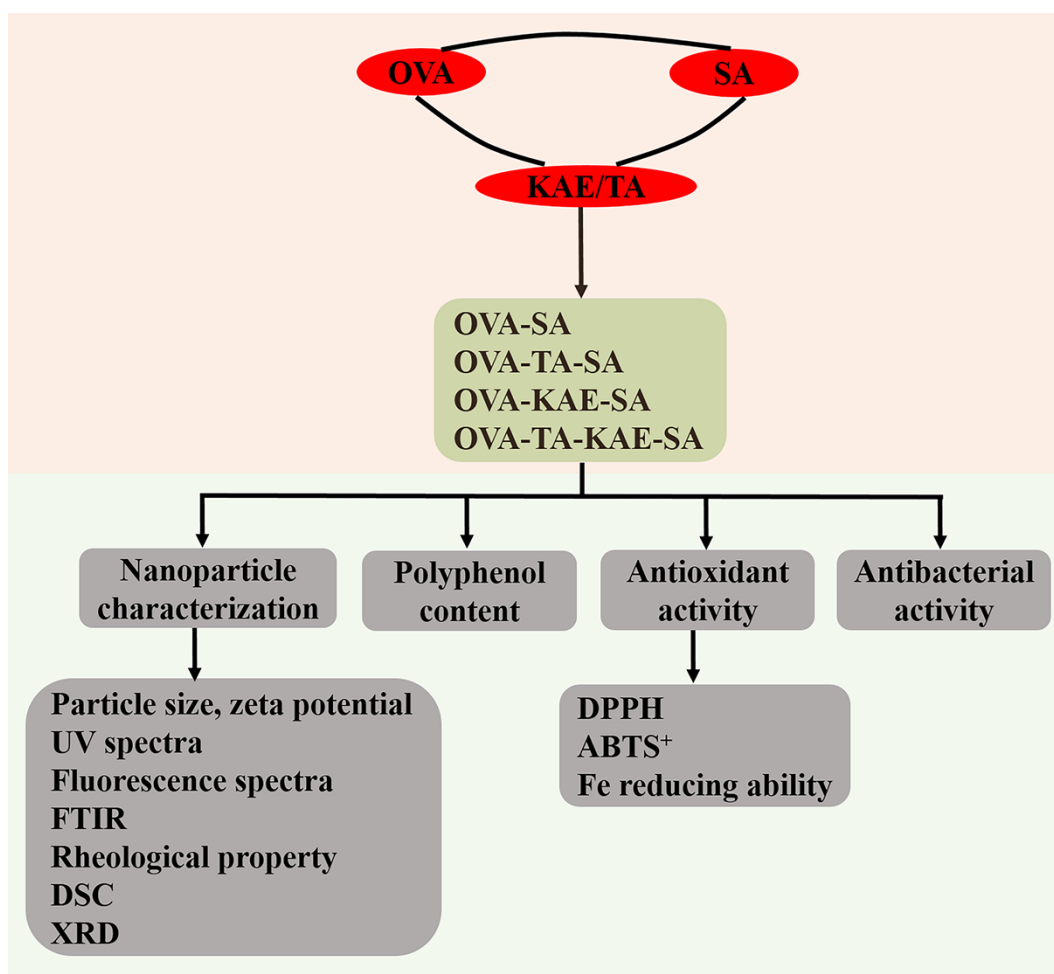

Supplementary Fig. S1 The flow diagram of this study.

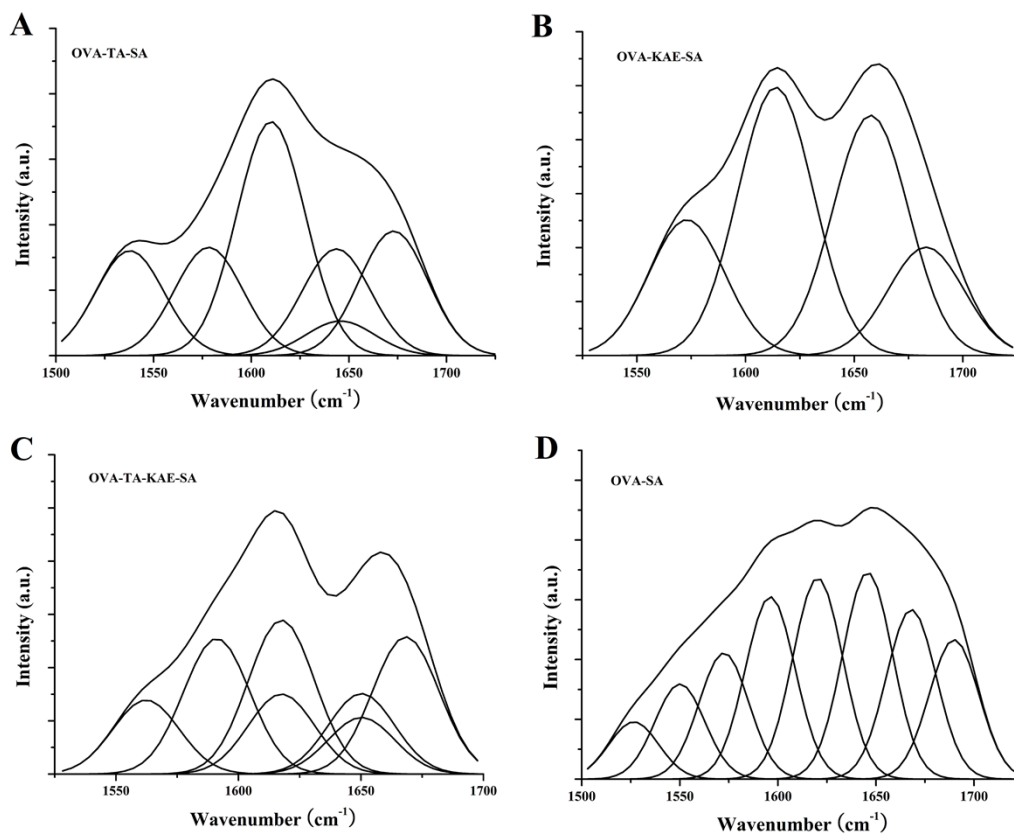

**Supplementary Fig. S2** Segregated and iterative curve-fitted Raman bands in amide I region.
